# Supplementary material for: Linear humidity response of carbon dot-modified molybdenum disulfide
Source: Royal Society of Chemistry journal article supplement (doi:10.1039/c7cp07125f), 2018-01-01
Supplement: c7cp07125f1.pdf [file c7cp07125f1.pdf]

## Supplementary Information

# Linear humidity response of carbon dots modified molybdenum disulfide

Guili He,<sup>a</sup> Da Huang,<sup>a</sup> Zhi Yang,<sup>\*a</sup> Yutong Han,<sup>a</sup> Jun Hu,<sup>a</sup> Nantao Hu,<sup>a</sup>  
Yanjie Su,<sup>a</sup> Zhihua Zhou,<sup>a</sup> Yafei Zhang<sup>a</sup> and Yan Zhang<sup>\*b</sup>

<sup>a</sup> Key Laboratory for Thin Film and Microfabrication of Ministry of Education,  
Department of Micro/Nano Electronics, School of Electronic Information and  
Electrical Engineering, Shanghai Jiao Tong University, Shanghai 200240, People's  
Republic of China

<sup>b</sup> School of Physical Electronics, University of Electronic Science and Technology of  
China, Chengdu 610054, People's Republic of China

\*Corresponding authors, E-mail: zhiyang@sjtu.edu.cn (Z. Yang),  
zhangyan@uestc.edu.cn (Y. Zhang).

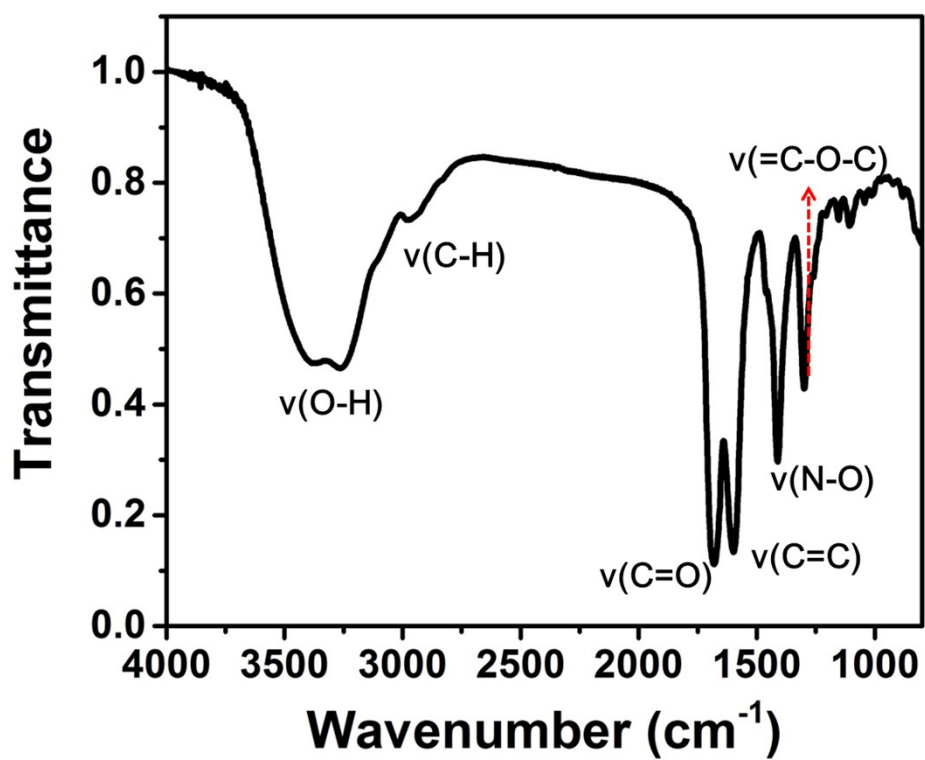

Fig. S1. FT-IR spectrum of CDs

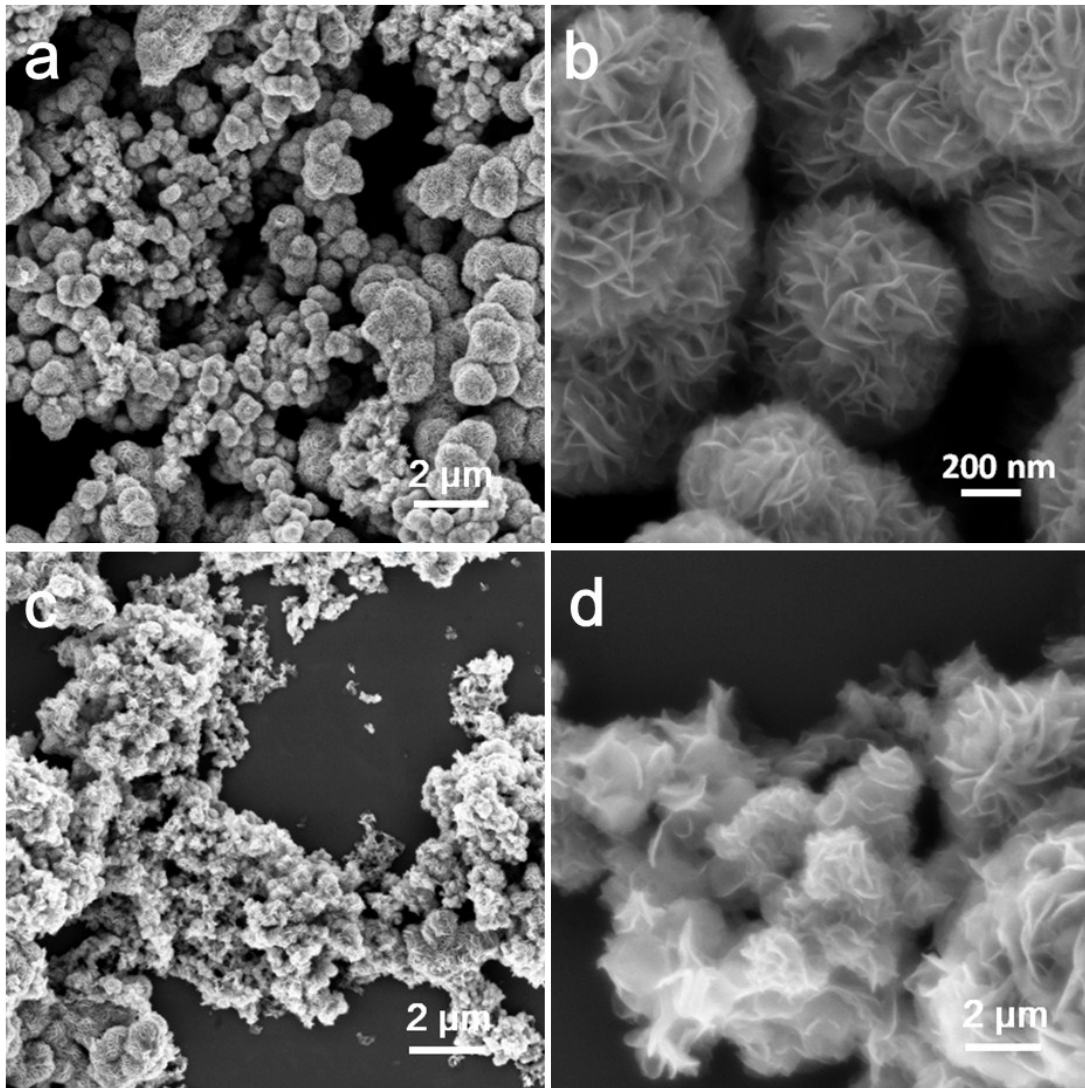

**Fig. S2.** SEM images of (a and b) CM6 and (c and d) CM12

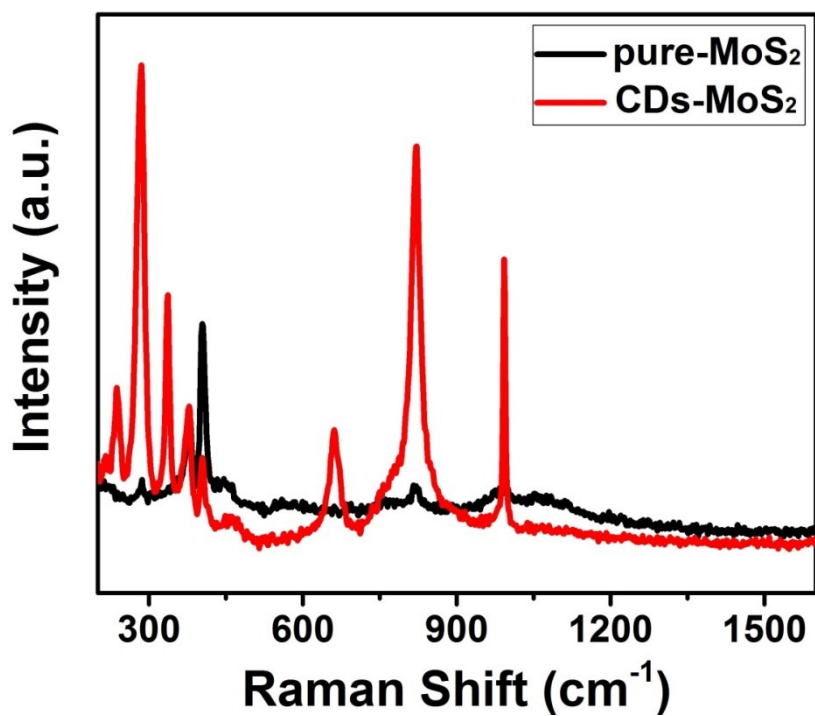

Fig. S3. Raman spectra of Pure-MoS<sub>2</sub> and CDs-MoS<sub>2</sub>

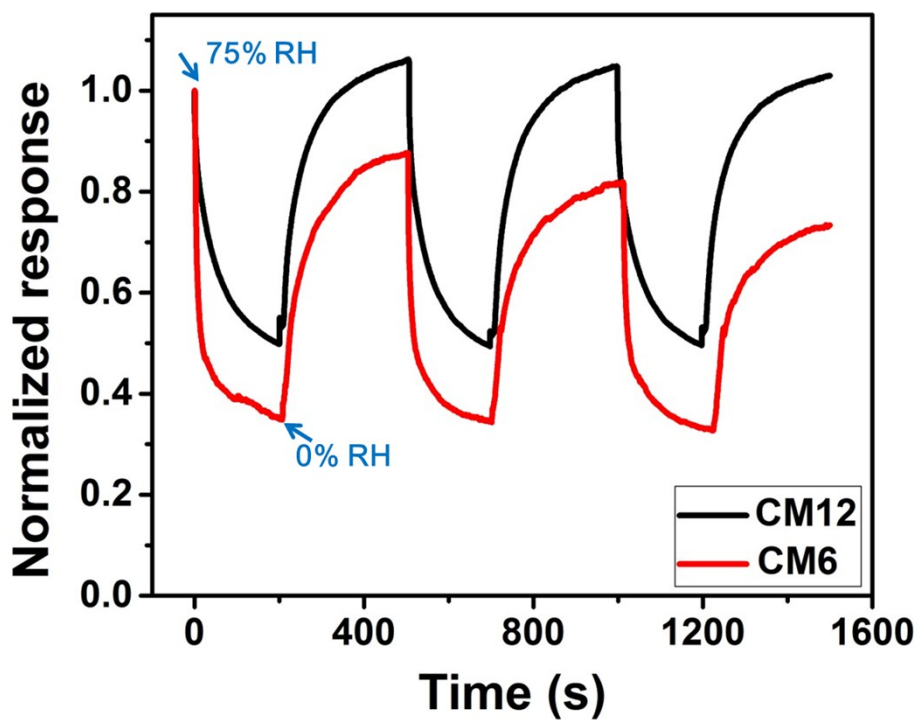

Fig. S4. Repeatability of humidity response for M6 and M12 at 75% RH

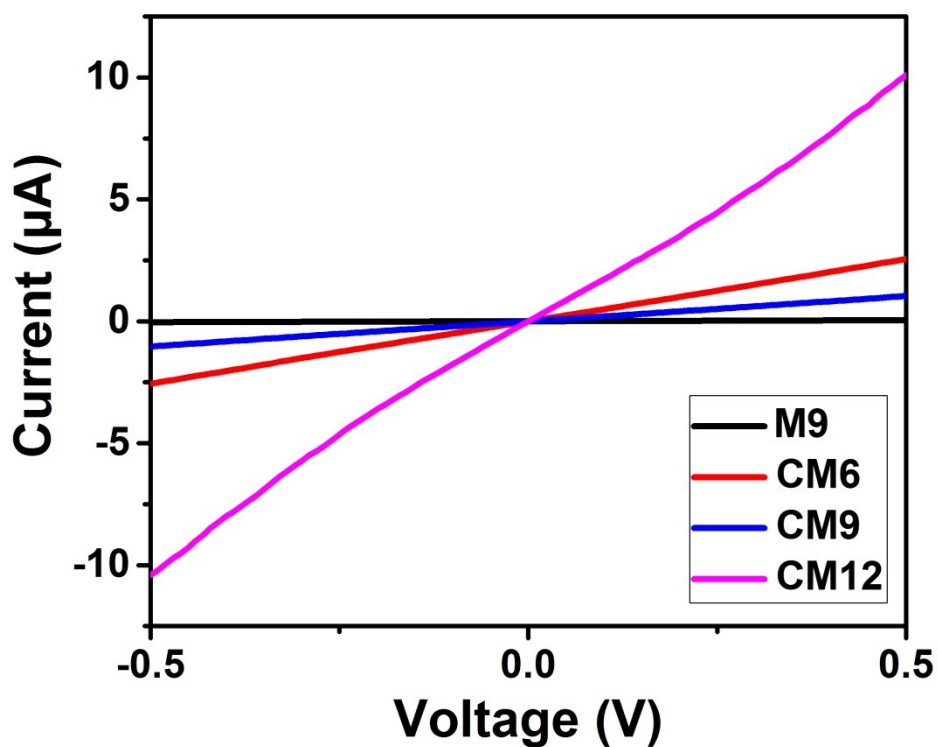

Fig. S5.  $I$ - $V$  curves of M9, CM6, CM9 and CM12

Table S1. Atomic percentages of C, O, S and Mo for M9, CM6, CM9 and CM12

| Products \ elements | C (at%) | O (at%) | S (at%) | Mo (at%) |
|---------------------|---------|---------|---------|----------|
| M9                  | 0       | 12.34   | 51.78   | 35.88    |
| CM6                 | 21.19   | 53.56   | 0.71    | 24.54    |
| CM9                 | 20.17   | 20.58   | 34.01   | 25.24    |
| CM12                | 19.81   | 18.33   | 34.68   | 27.19    |
